# Supplementary material for: In-vivo impact of common cosmetic preservative systems in full formulation on the skin microbiome
Source: PubMed Central journal article supplement (PMC8263265; doi:10.1371/journal.pone.0254172), 2021-07-07
Supplement: pone.0254172.s001.pdf [file pone.0254172.s001.pdf]

**S1 Table: Inclusion and Exclusion Criteria**

| <b>Inclusion Criteria</b> | <b>Description</b>                                                                                                                                                                                      |
|---------------------------|---------------------------------------------------------------------------------------------------------------------------------------------------------------------------------------------------------|
| I1                        | 18 to 55 years,                                                                                                                                                                                         |
| I2                        | Female,                                                                                                                                                                                                 |
| I3                        | Fitzpatrick skin type I-III;                                                                                                                                                                            |
| I4                        | BMI 18.5-39.9 (inclusive)                                                                                                                                                                               |
| I5                        | In general good health                                                                                                                                                                                  |
| I6                        | Has intact skin on test sites – no cuts, scratches, abrasions, scars, open wounds, etc.                                                                                                                 |
| I7                        | Non-diseased skin in test sites – no eczema, psoriasis, rosacea, rashes, hives, etc.                                                                                                                    |
| I8                        | Minimal hair within test sites – must shave or clip hair 48 hours or more before each study visit with assessments                                                                                      |
| I9                        | Willing and able to read and sign an Informed Consent Form, comply with the study restrictions, and carry out all study procedures.                                                                     |
| <b>Exclusion Criteria</b> | <b>Description</b>                                                                                                                                                                                      |
| E1                        | Is menopausal, post-menopausal or using any form of HRT (Study D only)                                                                                                                                  |
| E2                        | Has a history of serious illness that may require regular systemic medication (e.g. thyroid dysfunction, liver dysfunction) which may influence the study outcome (in the opinion of the study doctor). |
| E3                        | History of any type of cancer (if have had cancer must be greater than 6 months remission)                                                                                                              |
| E4                        | Has any immunological disorder (including, but not limited to, hepatitis, HIV+, AIDS, systemic lupus erythematosus, rheumatoid arthritis, hepatitis)                                                    |
| E5                        | History of any dermatological condition on the leg in adult life; e.g. eczema, psoriasis, ichthyosis, atopic dermatitis                                                                                 |
| E6                        | Is diabetic                                                                                                                                                                                             |
| E7                        | Use of immunosuppressive drugs; e.g. methotrexate, cyclosporine, prednisolone for the two months prior to the start of the study or if has started taking these medications during the study            |
| E8                        | Use of antimicrobial drugs; e.g. penicillin, cephalosporins, tetracyclins, fusidic acid for the two months prior to the start of the study.                                                             |
| E9                        | Use of any lipid lowering medication (e.g. statins) for two months prior to the start of the study.                                                                                                     |
| E10                       | Use of any steroidal medicine (inhaled, oral or topical)                                                                                                                                                |
| E11                       | Use of any topical medication on the lower outer leg                                                                                                                                                    |
| E12                       | Use of systemic anti-inflammatory medication on a frequent basis (at the discretion of the medical monitor)                                                                                             |
| E13                       | Has suspected allergy to soap, shower gel, moisturising products or any product containing yeast as well as any alcohols (such as rubbing alcohol or isopropanol)                                       |
| E14                       | Has excessive erythema or excoriations on the lower leg                                                                                                                                                 |

|     |                                                                                                                                                                                                             |
|-----|-------------------------------------------------------------------------------------------------------------------------------------------------------------------------------------------------------------|
| E15 | Has test sites with tattoo, scars or any other features that may affect the study procedures.                                                                                                               |
| E16 | Is currently pregnant or breast feeding (based on self- report only), or has given birth to or breast fed a child within the last 12 months.                                                                |
| E17 | Use of a sunbed or sun-shower in the month prior to the start of the study, or using one during the study or planning a holiday in the sun during the study.                                                |
| E18 | Currently suffering from any problems with the back, hips or legs that would make sampling from the lower outer leg excessively uncomfortable for the subject or logistically difficult for the study team. |
| E19 | Has any allergy to plasters/adhesive tape                                                                                                                                                                   |
| E20 | Smokers (Study D only)                                                                                                                                                                                      |
| E21 | Participated in another clinical study on the test sites within 4 weeks of study start.                                                                                                                     |
| E22 | Currently participating in or will begin, any other study simultaneously, at the site or another facility                                                                                                   |
| E23 | Is a healthcare worker (nurse, hospice care, doctor, etc.)                                                                                                                                                  |
