# Supplementary material for: In-vivo impact of common cosmetic preservative systems in full formulation on the skin microbiome
Source: PubMed Central journal article supplement (PMC8263265; doi:10.1371/journal.pone.0254172), 2021-07-07
Supplement: pone.0254172.s002.pdf [file pone.0254172.s002.pdf]

**S2 Table: Formulation Ingredients**

| <b>Product A</b>                     | <b>Product B</b>                      | <b>Product C</b>                      | <b>Product D</b>                     |
|--------------------------------------|---------------------------------------|---------------------------------------|--------------------------------------|
| Aqua                                 | Aqua                                  | Aqua                                  | Aqua                                 |
| Lauric Acid                          | Cocamidopropyl Betaine                | Cocamidopropyl Betaine                | Glycerin                             |
| Hydrogenated Soybean Oil             | Sodium Hydroxypropyl Starch Phosphate | Sodium Hydroxypropyl Starch Phosphate | Stearic Acid                         |
| Glycerin                             | Lauric Acid                           | Lauric Acid                           | Isopropyl Myristate                  |
| Glycine Soja (Soybean) Oil           | Sodium Lauroyl Glycinate              | Sodium Lauroyl Glycinate              | Mineral Oil                          |
| Petrolatum                           | Sodium Lauroyl Isethionate            | Sodium Lauroyl Isethionate            | Glycol Stearate/Stearamide AMP       |
| Sodium Lauroyl Glycinate             | Hydrogenated Soybean Oil              | Hydrogenated Soybean Oil              | Glyceryl Monostearate                |
| Sodium Cocoyl Isethionate            | Helianthus Annuus Seed Oil            | Helianthus Annuus Hybrid Oil          | Dimethicone                          |
| Sodium Lauroamphoacetate             | Glycerin                              | Glycerin                              | Peg-100 Stearate                     |
| Sodium Methyl Cocoyl Taurate         | Other process and stabilising agents  | Other process and stabilising agents  | Petrolatum                           |
| Other process and stabilising agents | Phenoxyethanol                        | Glydant Plus (IPBC/DMDM)              | Tapioca Starch                       |
| Glydant Plus (IPBC/DMDM)             | Tetrasodium EDTA                      | Tetrasodium EDTA                      | Other process and stabilising agents |
| Tetrasodium EDTA                     | Iodopropynyl Butylcarbamate           |                                       | Propylparaben                        |
|                                      |                                       |                                       | Methylparaben                        |
|                                      |                                       |                                       | Phenoxyethanol                       |
