# Supplementary material for: In-vivo impact of common cosmetic preservative systems in full formulation on the skin microbiome
Source: PubMed Central journal article supplement (PMC8263265; doi:10.1371/journal.pone.0254172), 2021-07-07
Supplement: pone.0254172.s003.pdf [file pone.0254172.s003.pdf]

**S3 Table: QIIME2 Software Parameters.** Software parameters for QIIME2 used to process and analyse metataxonomic data

| <b>Software Parameter</b>                 | <b>Value</b>  |
|-------------------------------------------|---------------|
| FastQC filtering min gc percentage        | 25            |
| FastQC filtering max gc percentage        | 75            |
| FastQC filtering min average base quality | 20            |
| DADA2 forward read trim position          | 21            |
| DADA2 reverse read trim position          | 19            |
| DADA2 forward read truncation position    | No truncation |
| DADA2 reverse read truncation position    | No truncation |
| BLAST+ penalty                            | -5            |
| BLAST+ reward                             | 4             |
| BLAST+ gapopen                            | 5             |
| BLAST+ gapextend                          | 5             |
