# Supplementary material for: In-vivo impact of common cosmetic preservative systems in full formulation on the skin microbiome
Source: PubMed Central journal article supplement (PMC8263265; doi:10.1371/journal.pone.0254172), 2021-07-07
Supplement: pone.0254172.s004.pdf [file pone.0254172.s004.pdf]

**S4 Table: Software Versions.** Software versions utilised to process and analyse metataxonomic data

| <b>Software</b> | <b>Version</b> |
|-----------------|----------------|
| FastQC          | v0.11.5        |
| MultiQC         | 1.7            |
| QIIME2          | 2019.4         |
| DADA2           | QIIME2 2019.1  |
| BLAST+          | 2.6.0+         |
| scikit-learn    | QIIME2 2019.1  |
